# Supplementary material for: Resveratrol Alleviates Diabetic Periodontitis-Induced Alveolar Osteocyte Ferroptosis Possibly via Regulation of SLC7A11/GPX4
Source: MDPI journal article supplement (doi:10.3390/nu15092115), 2023-04-28
Supplement: s1 [file s1]

## Supplementary materials

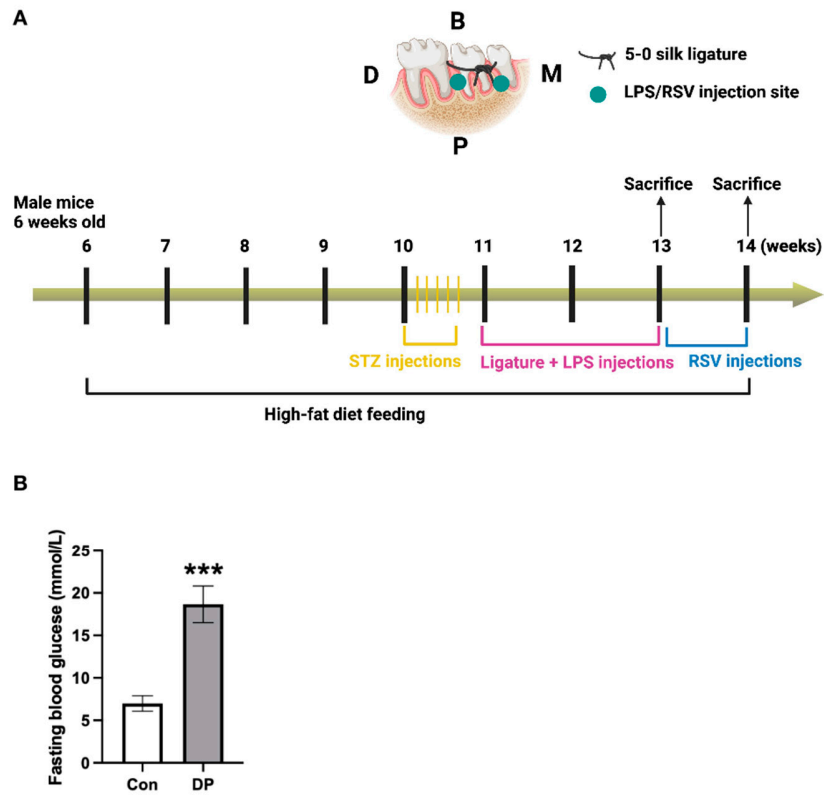

**Supplementary Figure S1:** (A) Flow chart of modeling of mice diabetes periodontitis disease model. (B) Blood glucose detection of mice at 12 weeks. \*\*\*  $p < 0.001$ .

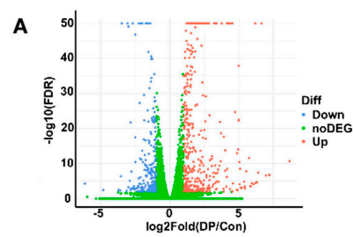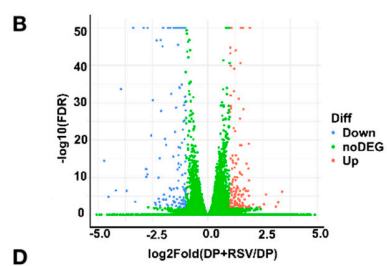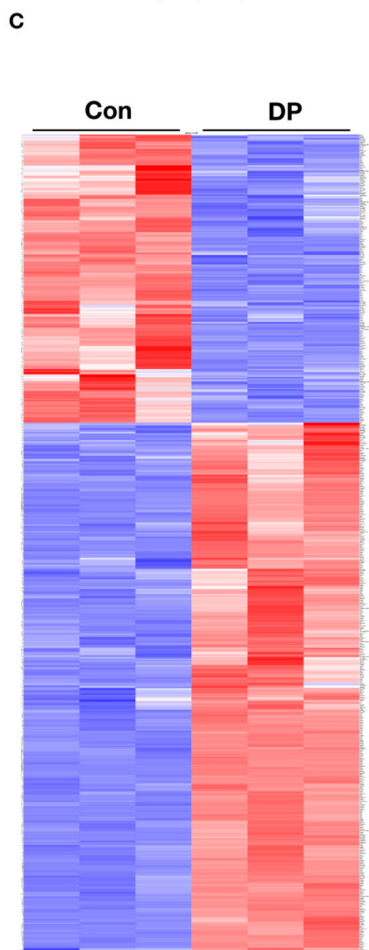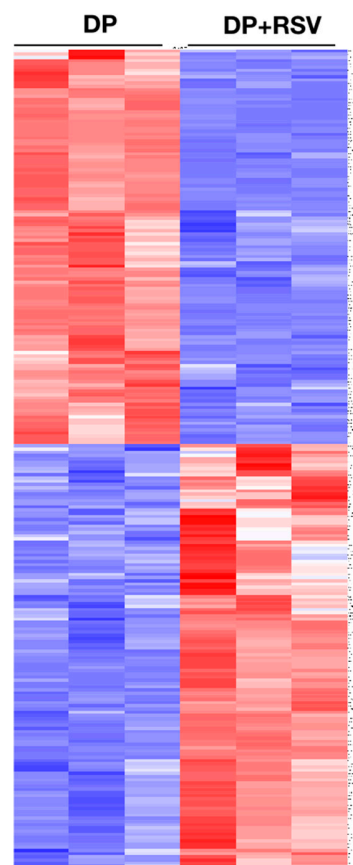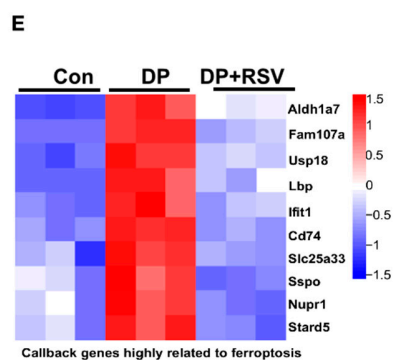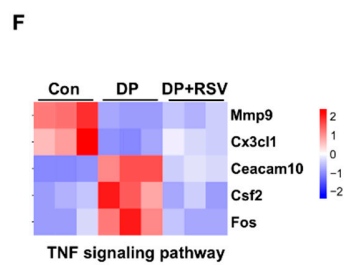

**Supplementary Figure S2:** (A) Volcano map showing differentially expressed mRNAs. in Con vs. DP. (B) Volcano map showing differentially expressed mRNAs. in DP vs. DP+RSV. (C) Heatmap of differentially expressed mRNAs. in Con vs. DP. (D) Heatmap of differentially expressed mRNAs. in DP vs. DP+RSV. (E) Heatmap of callback genes highly related to ferroptosis. (F) Heatmap of TNF signaling pathway in callback genes.

**A**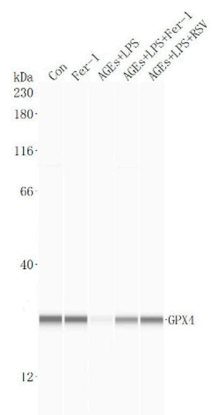**B**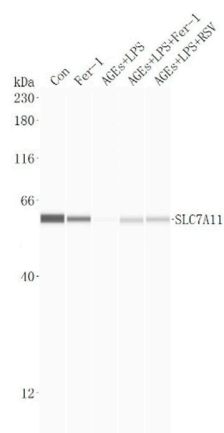**C**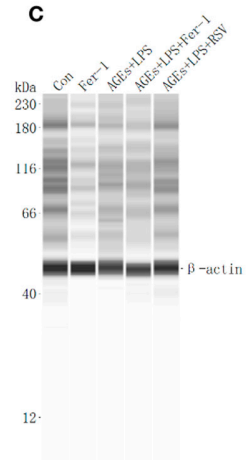**D**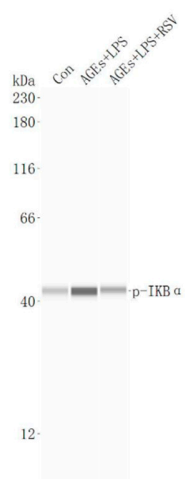**E**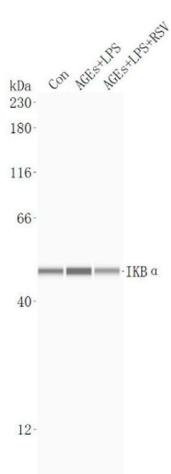**F**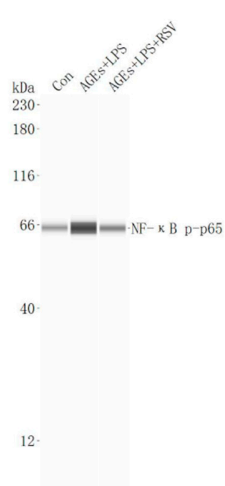**G**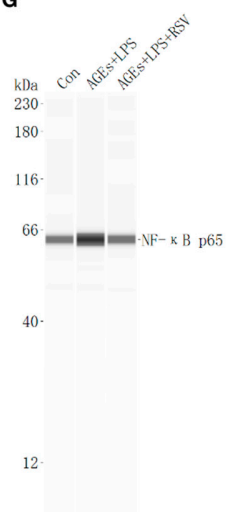**H**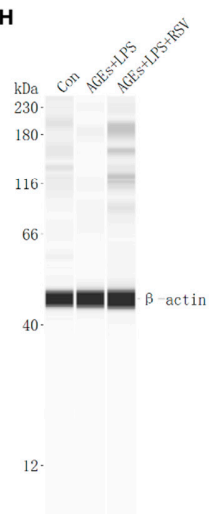

**Supplementary Figure S3:** Original blot for Fig. 4E. Capillary-based immunoassay analysis of (A) GPX4, (B) SLC7A11, and (C)  $\beta$ -actin in osteocytes. Original blot for Fig. 6C. Capillary-based immunoassay analysis of (D) p-IKB $\alpha$ , (E) IKB $\alpha$ , (F) NF- $\kappa$ B p-p65, (G) NF- $\kappa$ B p65, and (H)  $\beta$ -actin in osteocytes.
